# Supplementary material for: Poly(tetrasubstituted-aryl imidazole)s: A Way to Obtain Multi-Chromophore Materials with a Tunable Absorption/Emission Wavelength
Source: MDPI journal article supplement (doi:10.3390/pr11102959), 2023-10-12
Supplement: s1 [file s1]

Archive with 1 entries (1 files):
- processes-2640789-supplementary.pdf
