# Supplementary material for: Poly(tetrasubstituted-aryl imidazole)s: A Way to Obtain Multi-Chromophore Materials with a Tunable Absorption/Emission Wavelength
Source: MDPI journal article supplement (doi:10.3390/pr11102959), 2023-10-12
Supplement: s1 [file s1 › processes-2640789-supplementary.pdf]

# Poly(tetrasubstituted-aryl imidazole)s: A Way to Obtain Multi-Chromophore Materials with a Tunable Absorption/Emission Wavelength

Edouard Chauveau<sup>1,\*</sup>, Lara Perrin<sup>2</sup>, Catherine Marestin<sup>3</sup> and Régis Mercier<sup>3</sup>

<sup>1</sup> Laboratory Charles Coulomb (L2C-UMR5221), University Montpellier, CNRS, Place Eugène Bataillon, 34095 Montpellier, France

<sup>2</sup> Laboratory of Electrochemistry and Physicochemistry of Materials and Interfaces (LEPMI-UMR5279), University Grenoble Alpes, University Savoie Mont Blanc, CNRS, Grenoble INP, 38000 Grenoble, France

<sup>3</sup> Laboratory Polymer Materials Engineering (IMP-UMR 5223), University Lyon, University Claude Bernard Lyon 1, CNRS, 15 Boulevard Latarjet, 69622 Villeurbanne, France

\* Correspondence: edouard.chauveau@umontpellier.fr

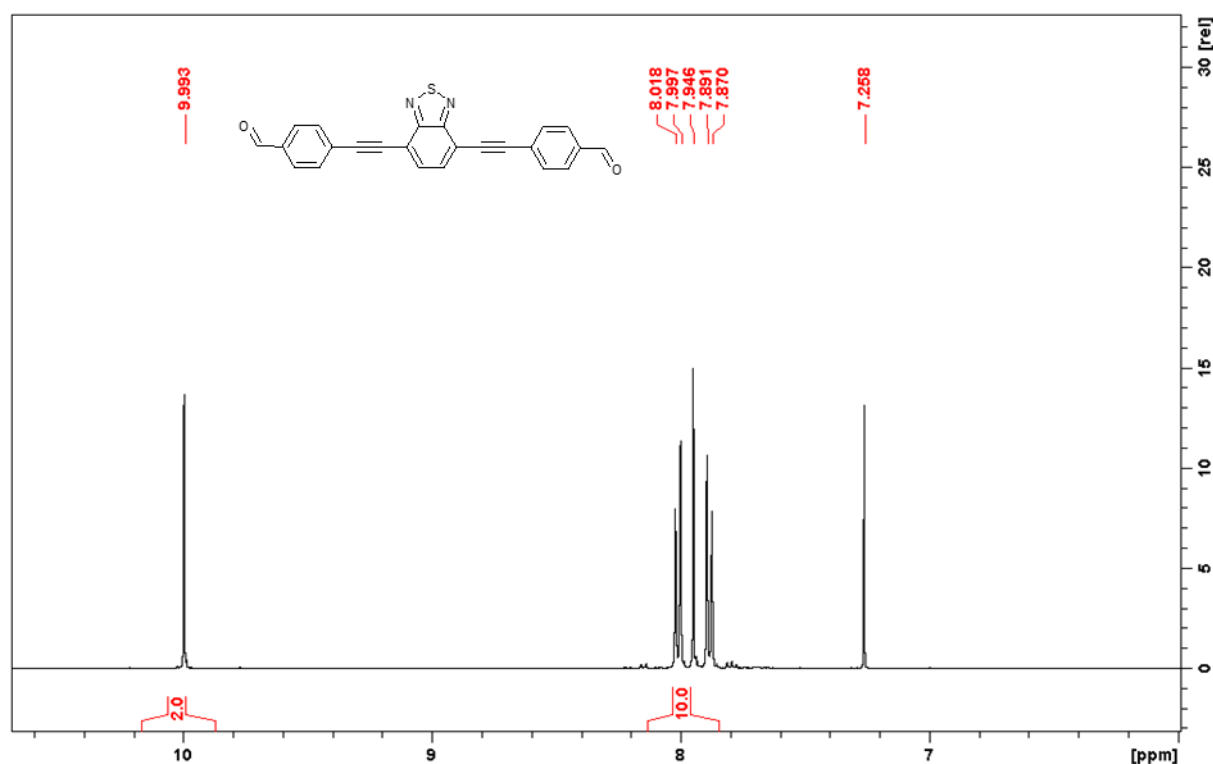

Figure S1. <sup>1</sup>H NMR spectrum of monomer M2 in CDCl<sub>3</sub>.

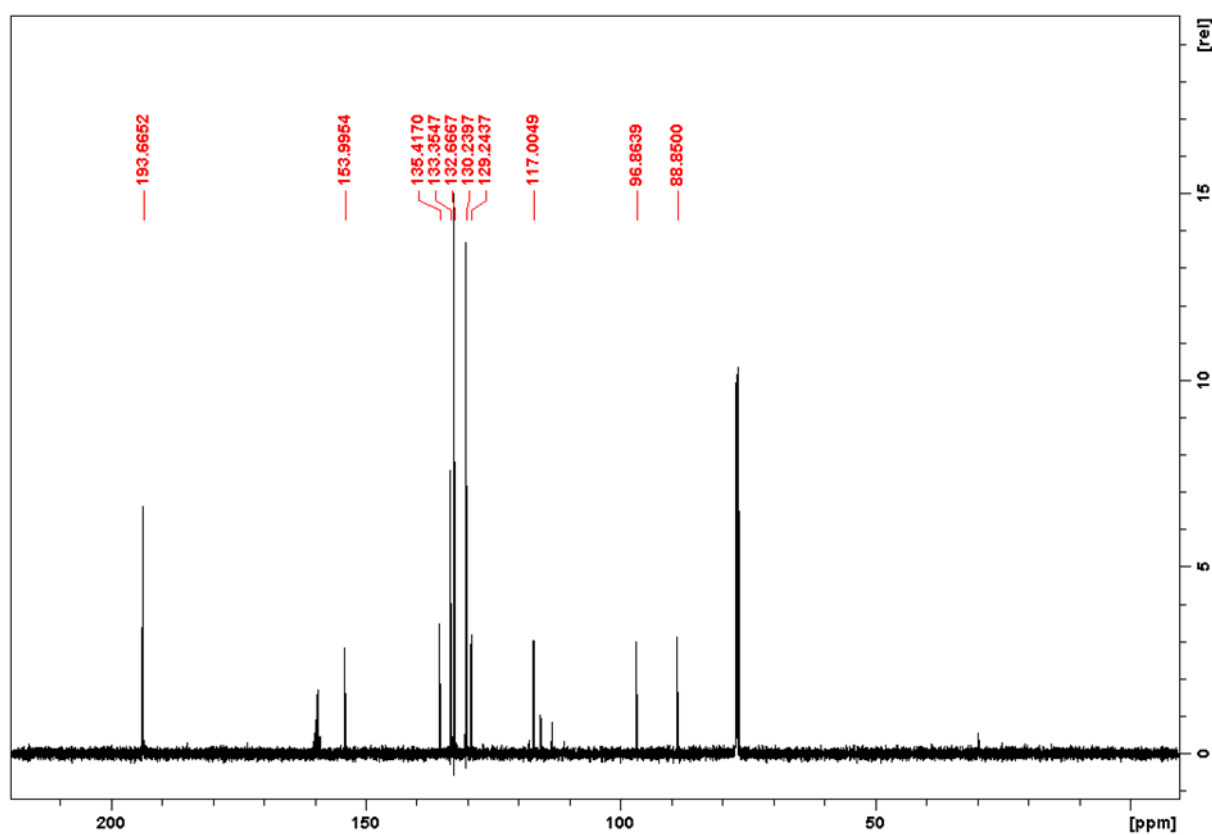

Figure S2. <sup>13</sup>C NMR spectrum of monomer M2 in CDCl<sub>3</sub>.

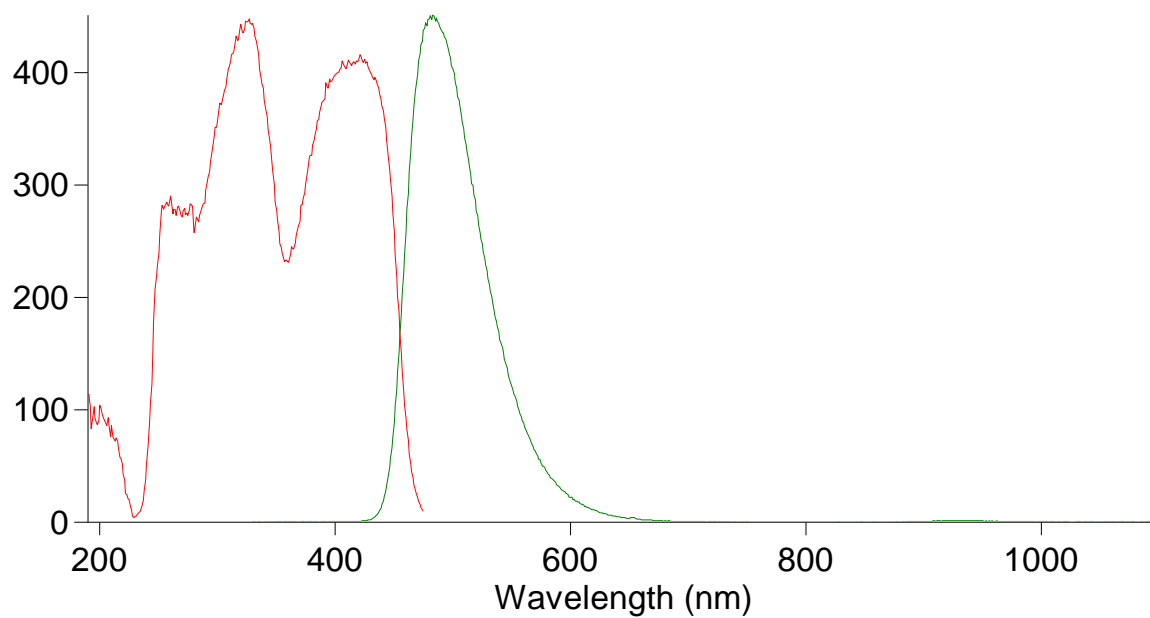

Figure S3. Excitation (left) and emission (right) spectra of monomer M2 in CHCl<sub>3</sub>.

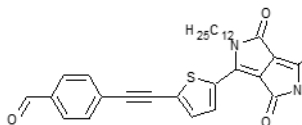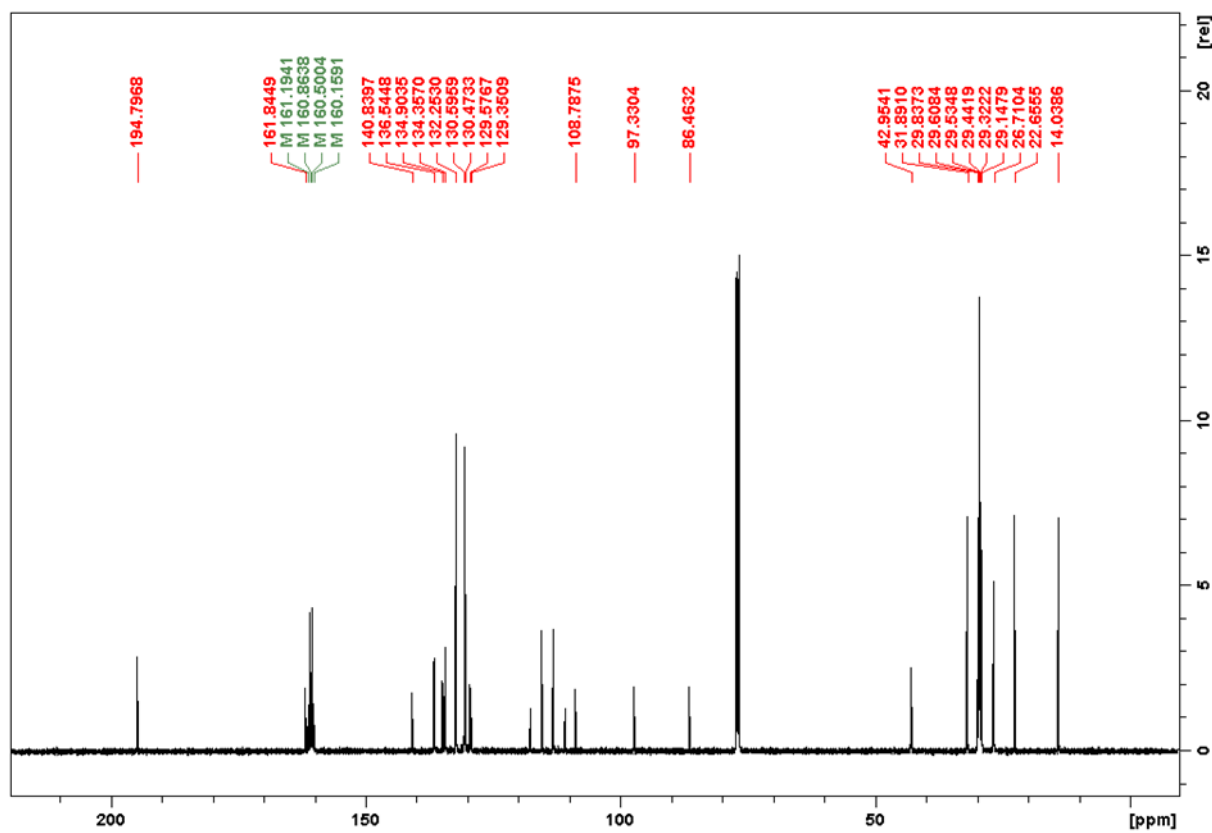

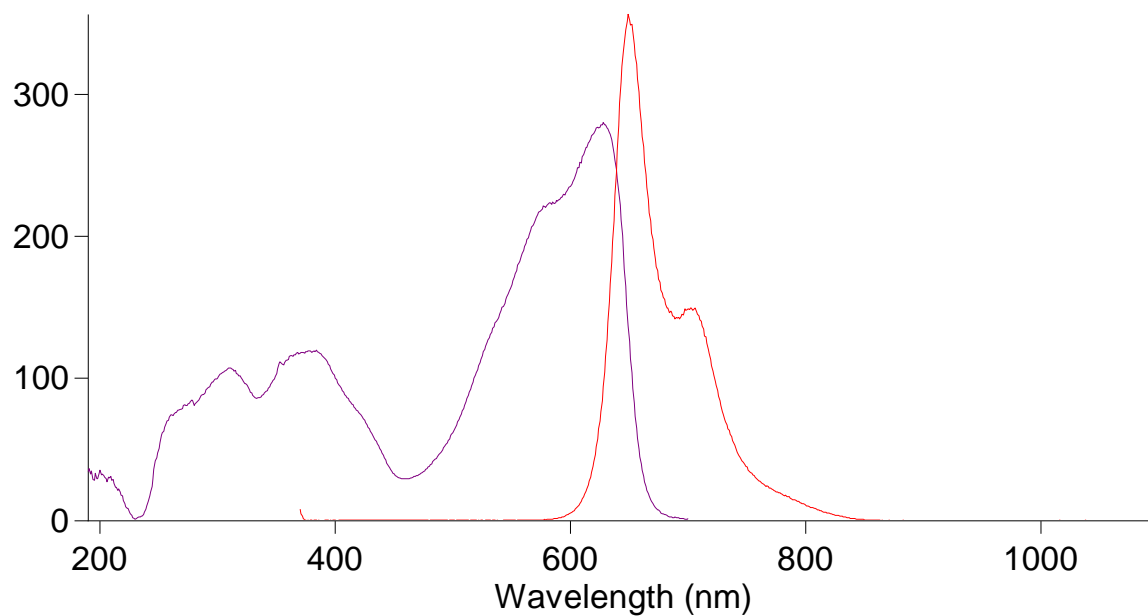

**Figure S6.** Excitation (left) and emission (right) spectra of monomer M3 in  $\text{CHCl}_3$ .

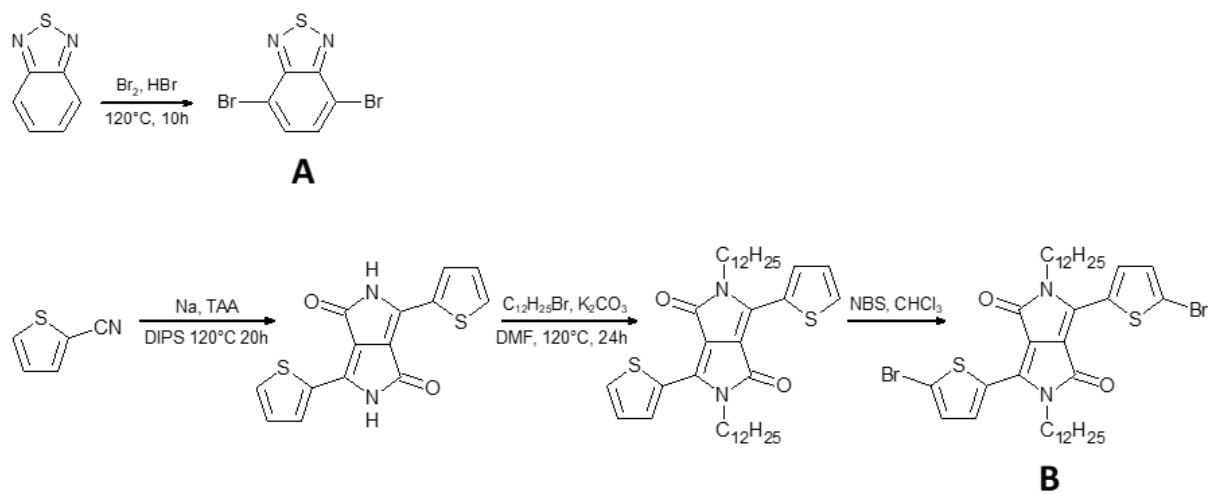

**Scheme S1.** Synthetic route to A and B compounds, chemical building blocks for monomers M2 and M3.

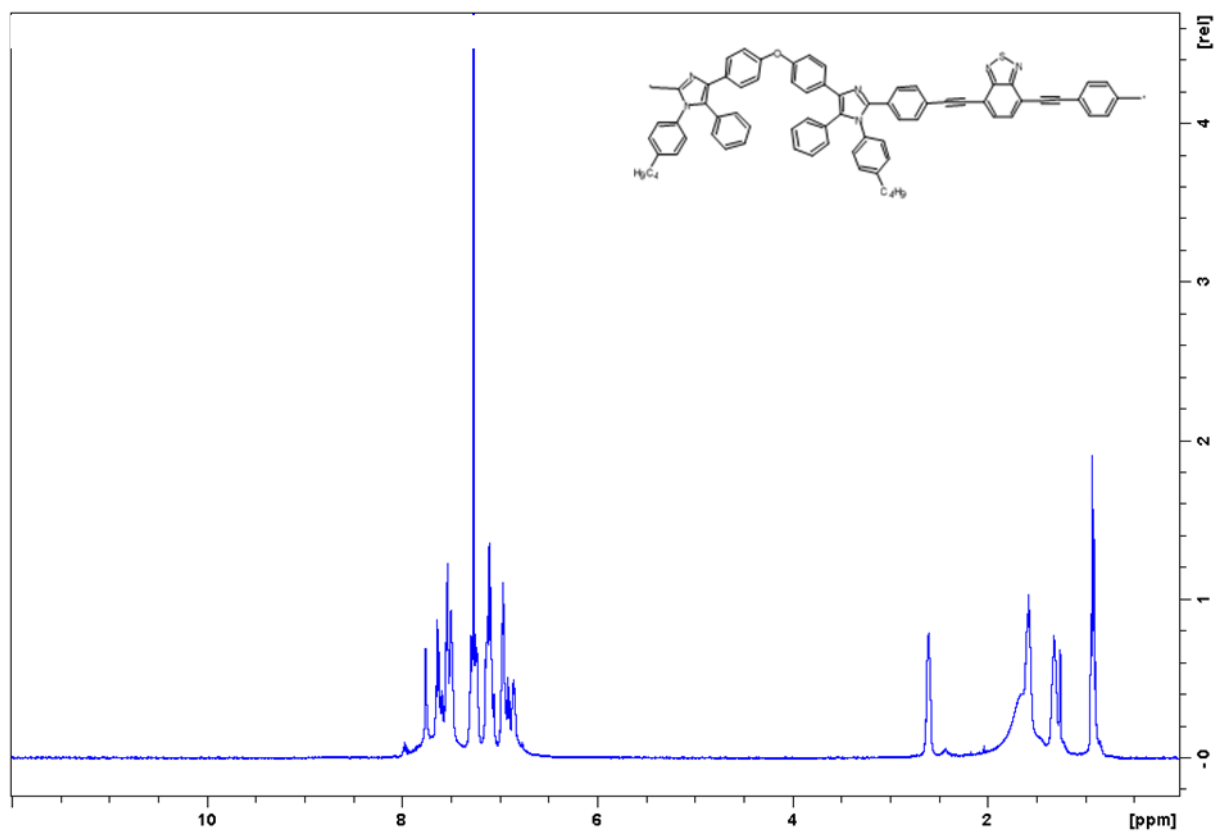

Figure S7.  $^1\text{H}$  NMR spectrum of polymer P2 in  $\text{CDCl}_3$ .

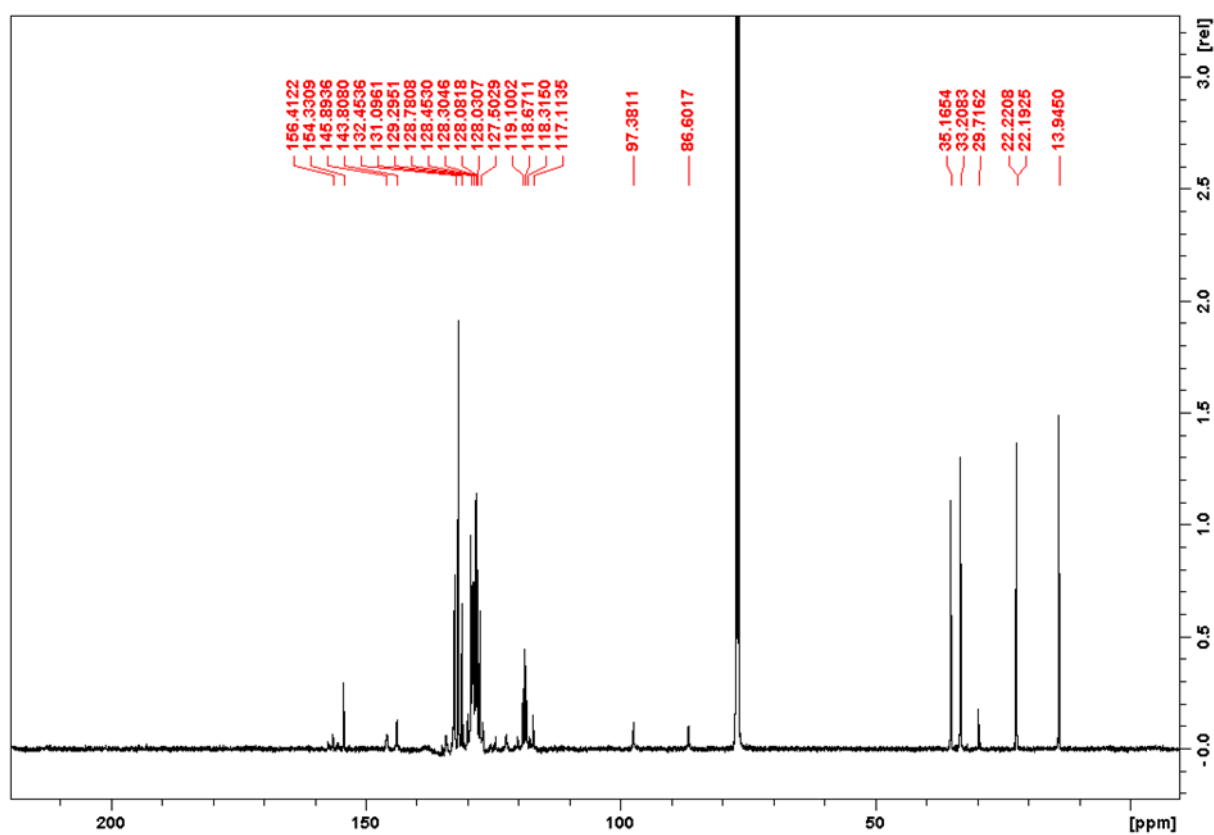

Figure S8.  $^{13}\text{C}$  NMR spectrum of polymer P2 in  $\text{CDCl}_3$ .

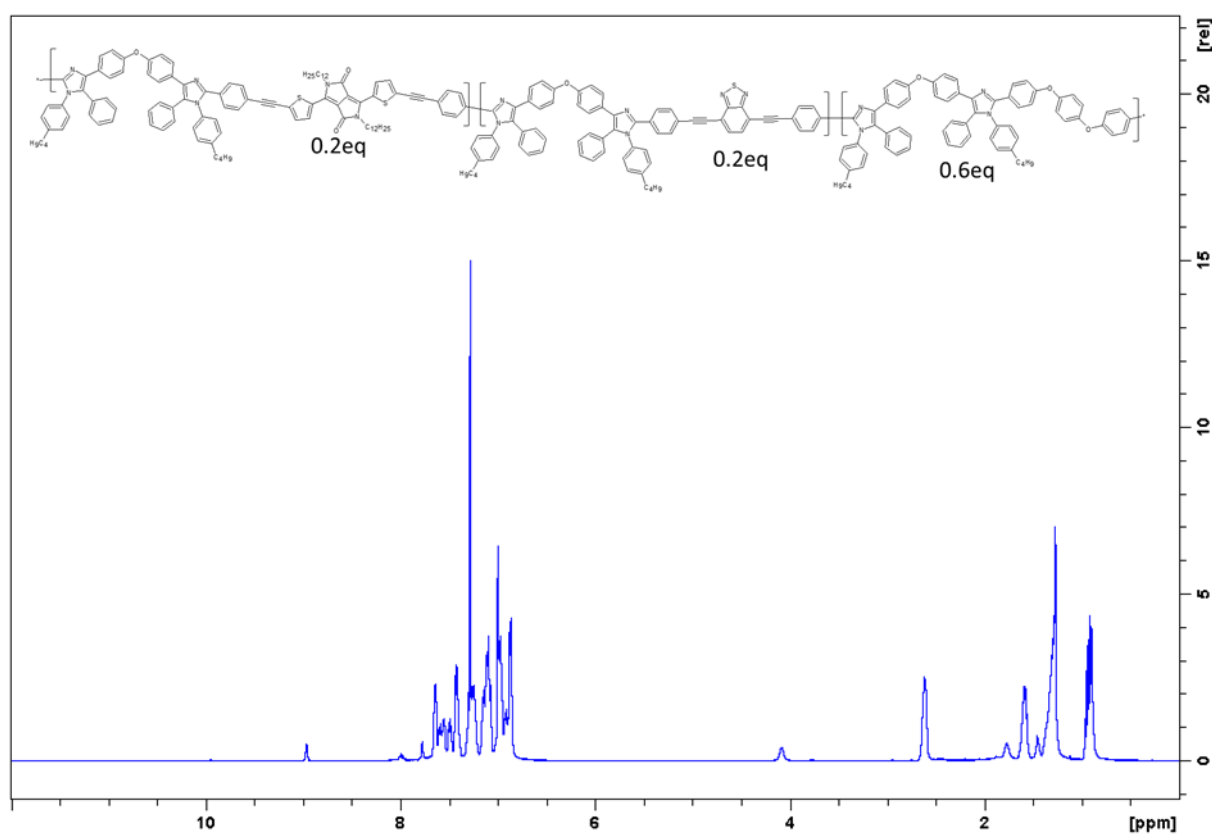

Figure S9. <sup>1</sup>H NMR spectrum of polymer P3 in CDCl<sub>3</sub>.

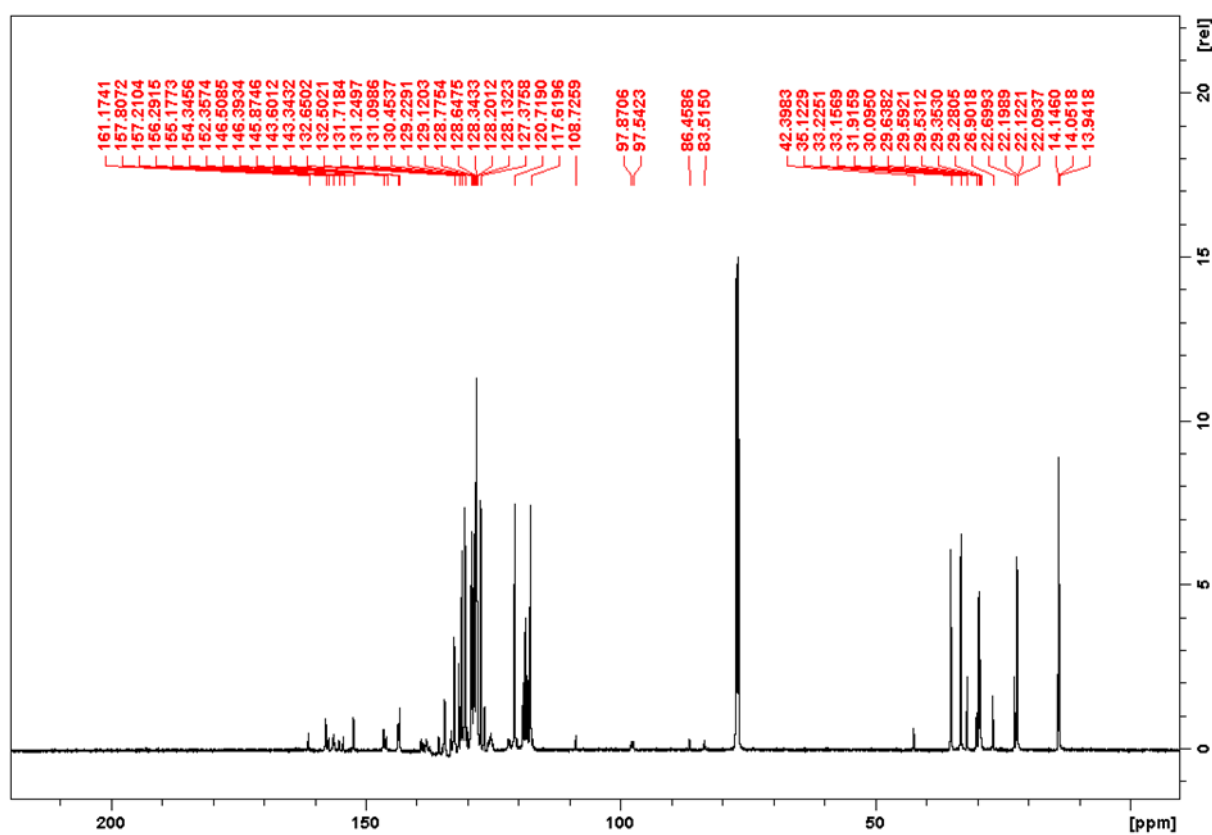

Figure S10. <sup>13</sup>C NMR spectrum of polymer P3 in CDCl<sub>3</sub>.

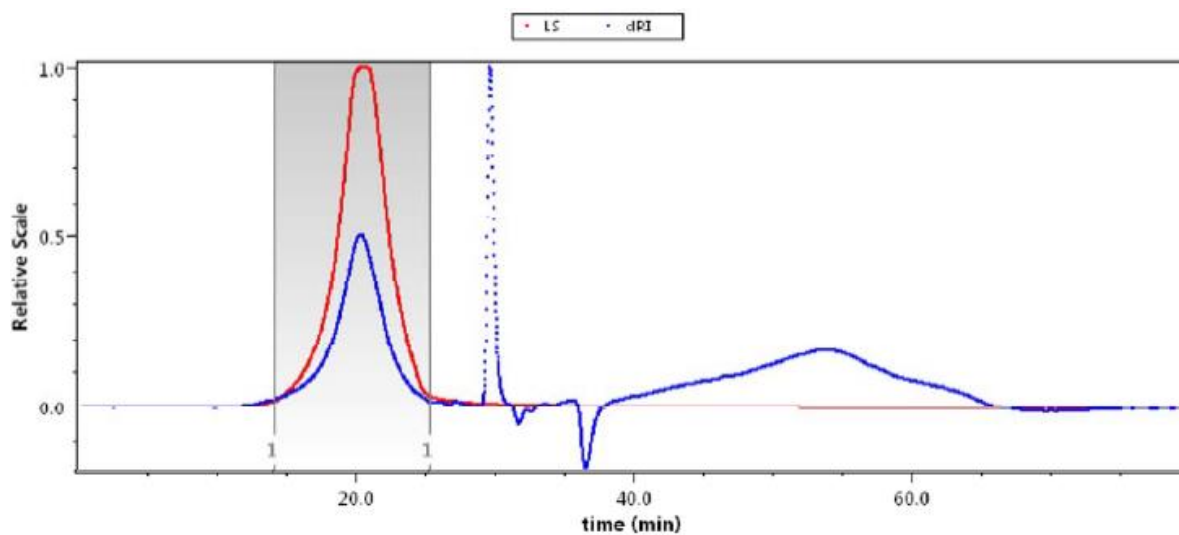

**Figure S11.** Typical SEC trace, here is presented P3.

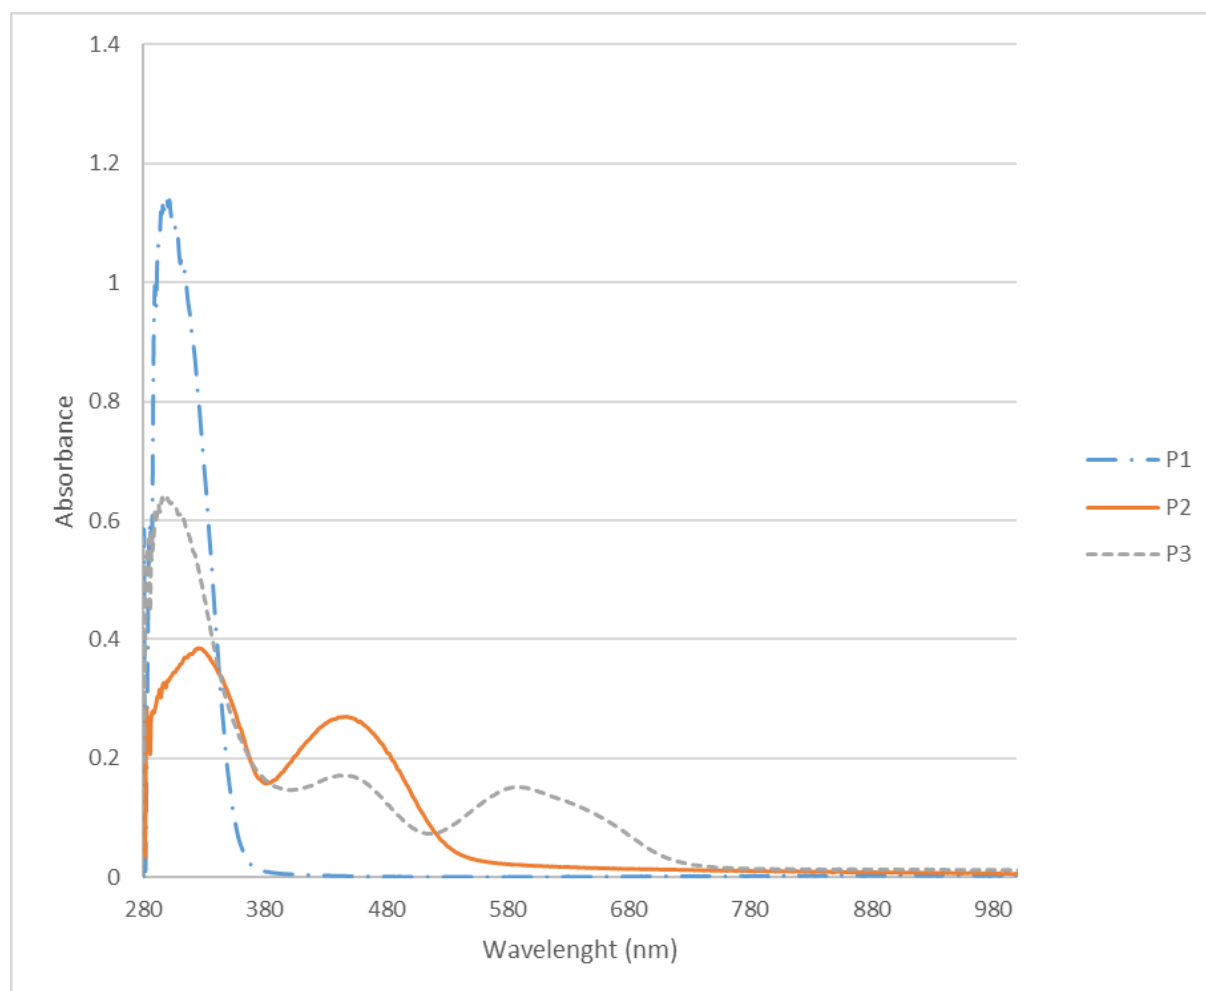

**Figure S12.** UV-Vis absorbance spectra of P1, P2 and P3 (in solid state).

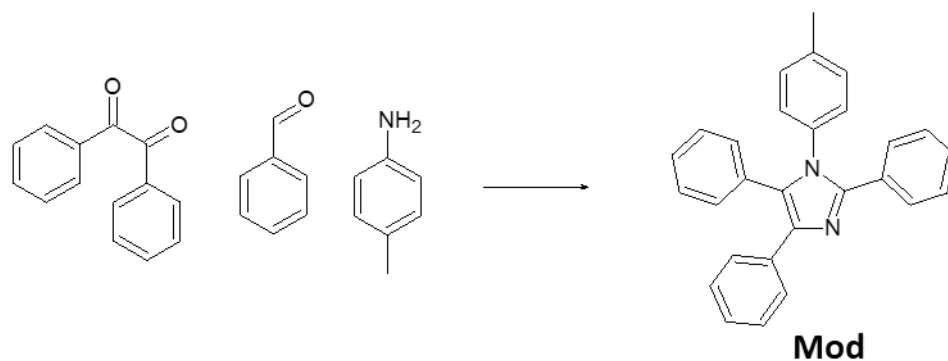

**Scheme S2.** Synthetic route for tetra-aryl imidazole model molecule (Mod), according to a procedure described by K. Pradhan et al. (K. Pradhan, B. K. Tiwary, M. Hossain, R. Chakraborty and A. K. Nanda, RSC Adv., 2016, 6, 10743).

Experimental procedure: Benzil 1g (4.7mmol), benzaldehyde 0.5g (4.7mmol), toluidine 1.6g (14.2mmol) and ammonium acetate 0.74g (9.5mmol) were placed into a mortar and grinded until to obtain an homogeneous mixture. Then, the paste was transferred into a test tube and places directly in an oil bath at 160°C. After 15min, the mixture was cooled to room temperature and ethanol was added. The precipitate was collected by filtration and washed with hot ethanol to furnish the desired product as a white powder (70% yield).

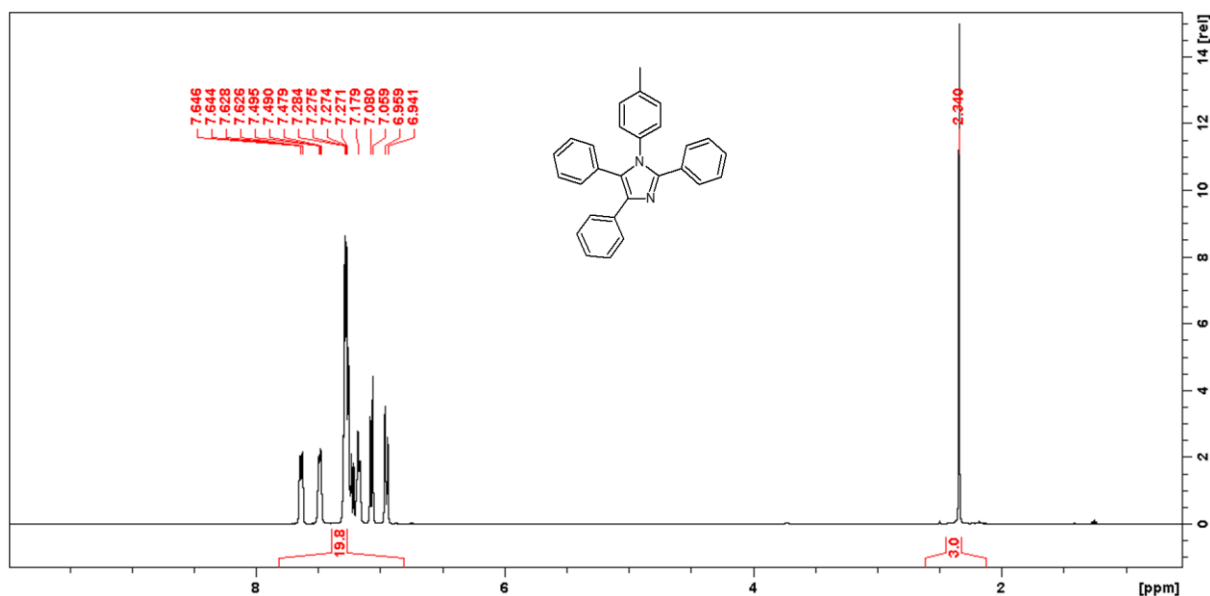

**Figure S13.**  $^1\text{H}$  NMR spectrum of model compound Mod in  $\text{CDCl}_3$ .

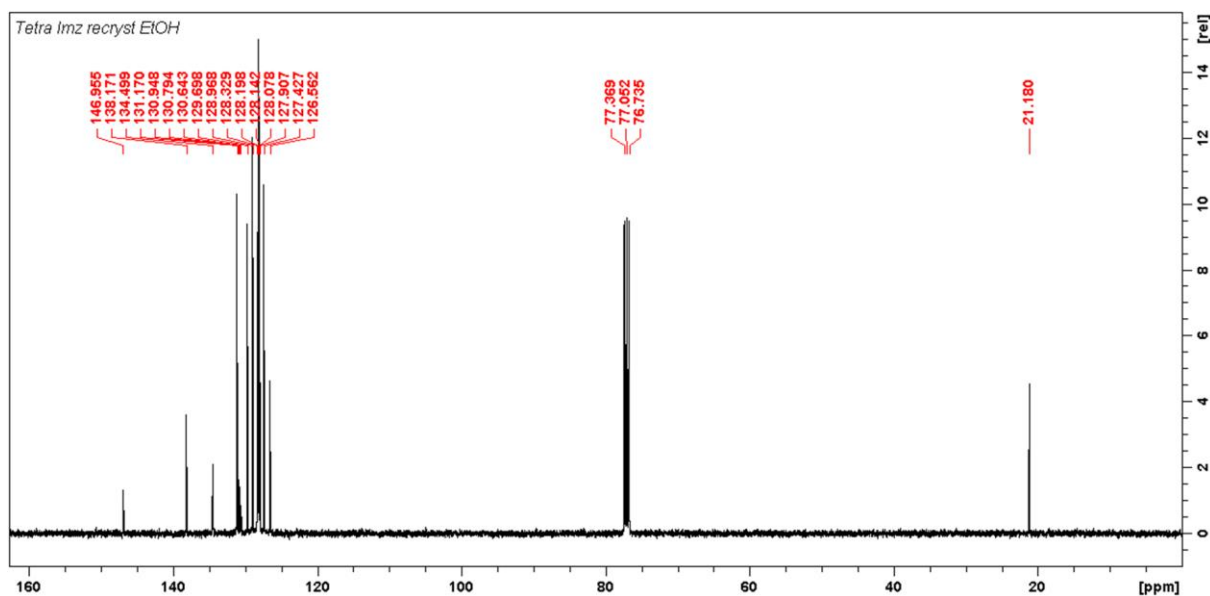

Figure S14.  $^{13}\text{C}$  NMR spectrum of model compound Mod in  $\text{CDCl}_3$ .

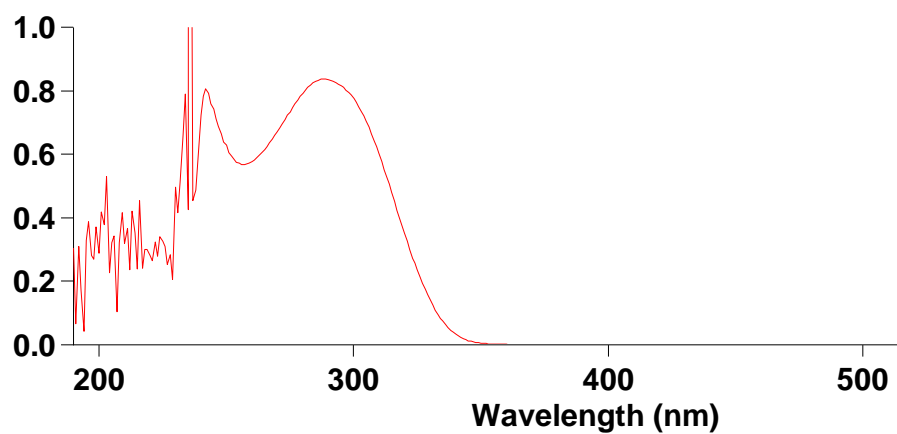

Figure S15. UV-vis absorbance spectrum of the model compound Mod in  $\text{CHCl}_3$ .

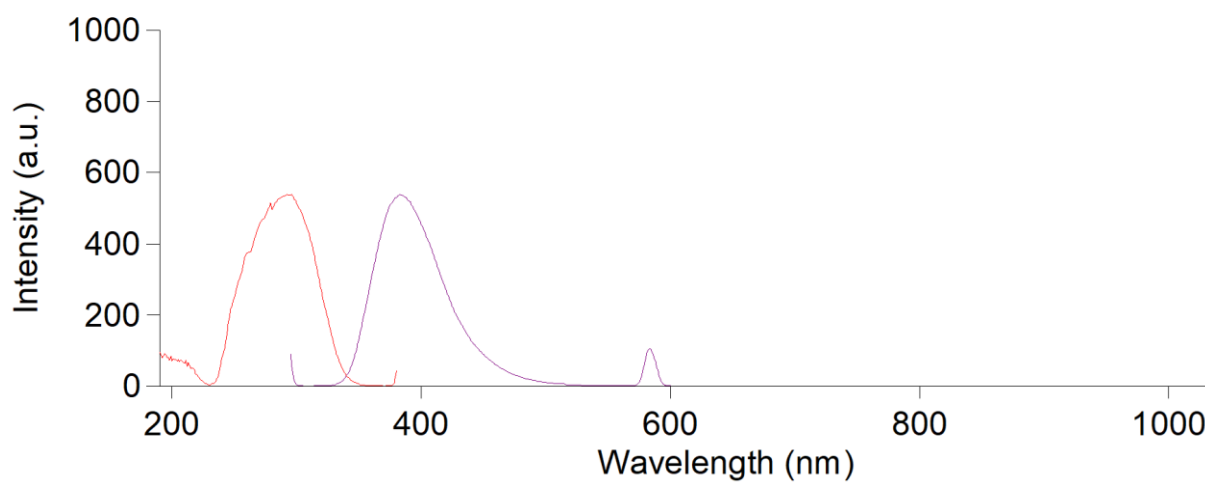

Figure S16. Excitation (left) and emission (right) spectra of the model compound Mod in  $\text{CHCl}_3$ .
